# Supplementary material
Source: PubMed Central journal article supplement (PMC3259687)
Supplement: NIHMS141322-supplement-02.pdf [file NIHMS141322-supplement-02.pdf]

## SUPPLEMENTAL FIGURE LEGENDS

### **SOM Figure 1. Purity of FACS sorted cells in uninjured and injured muscle.**

(A) Representative FACS plots from cells isolated from TA muscles and stained with anti-Syndecan-4-APC, anti-CD31-FITC, and anti-CD45-FITC antibodies (right panel). Unstained cells shown on left panel were used to set positive selection gate, indicated by the bracketed area.  $\text{Syn4}^+/\text{CD31}^-/\text{CD45}^-$  were collected and used for further study of myogenic cells. (B) A fraction of cells (n=2000) from the positive selected gate (panel A) were analyzed by immunohistochemistry immediately after sorting. Cells from uninjured muscle were ~97% myogenic based on expression of Pax7 and cells from injured muscle were also ~97% myogenic based on expression of both Pax7 and MyoD. DAPI stains all nuclei.

### **SOM Figure 2. *Myf5-Cre, ROSA26-βgal* is a read-out of the Myf5 lineage and the efficiency of Cre-mediated recombination in muscle satellite cells and their progeny**

Single fibers were isolated from *Myf5-Cre, ROSA26-βgal* muscle. Some fibers were fixed and stained immediately. From other fibers, satellite cells were either stripped and fixed immediately or cultured for 3 days and then fixed. Cells were stained with X-gal (upper row) to detect recombination and gene excision. 100% of fibers, ~96% of satellite cells and ~97% of satellite cell progeny (myogenic progenitors) were positive for X-gal

reactivity. No X-gal reactivity was detected in muscle fibers or progenitors from control muscles (negative for Cre). DAPI stains all nuclei.

**SOM Figure 3. siRNA against BCL9/9-2 decreases Fusion Index in primary myoblasts**

Effect of exogenous DKK1 on BrdU incorporation in progenitors from single fibers isolated from control mice and incubated for 3 days in plating medium with various concentrations of DKK1 added for the final day. The percentage of BrdU<sup>+</sup>/Desmin<sup>+</sup> cells was quantified. (\*  $p < 0.05$ )
