# Supplementary material
Source: PubMed Central journal article supplement (PMC3259687)

A

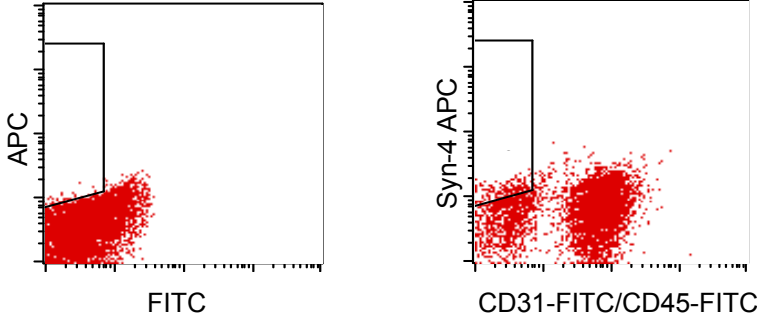

B

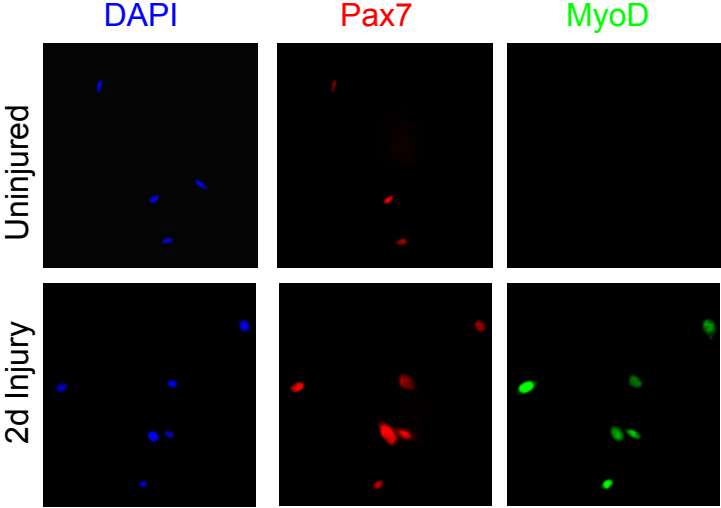

SOM Figure 2

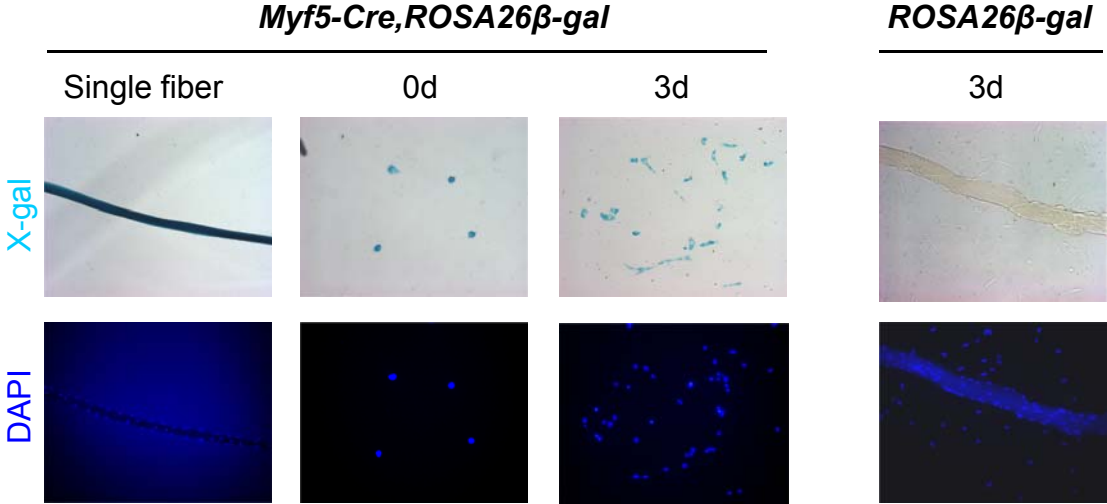

# SOM Figure 3

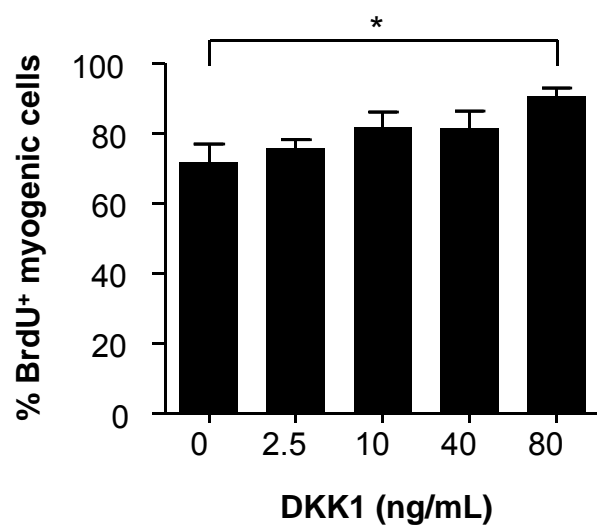

Supplement: NIHMS141322-supplement-01.pdf [file NIHMS141322-supplement-01.pdf]
